# Supplementary material for: A rigidity–flexibility balance strategy enabling highly photoluminescent two-dimensional covalent organic framework nanosheets
Source: Royal Society of Chemistry journal article supplement (doi:10.1039/d2cc03498k), 2022-01-01
Supplement: d2cc03498k1.pdf [file d2cc03498k1.pdf]

*Supporting Information for*

**Rigidity-Flexibility Balance Strategy Enables Highly  
photoluminescent Two-dimensional Covalent Organic Framework  
Nanosheets**

Hao Wang,<sup>a,‡</sup> Chengtao Gong,<sup>a,‡</sup> Peng Jin,<sup>a</sup> Chenglong Guo,<sup>a</sup> Danfeng Wang,<sup>a</sup> Guodong Xu,<sup>b</sup> and Yongwu Peng<sup>\*a</sup>

<sup>a</sup>College of Materials Science and Engineering and College of Chemical Engineering, Zhejiang University of Technology, Hangzhou, 310014, China

<sup>b</sup>Jiangsu Province Engineering Research Centre of Agricultural Breeding Pollution Control and Resource, Yancheng Teachers University, Yancheng 224007, China

E-mail: ywpeng@zjut.edu.cn

<sup>‡</sup>H Wang and G. T. Gong contributed equally to this work.

## Table of Content

|                                                                                                    |     |
|----------------------------------------------------------------------------------------------------|-----|
| 1. Materials and methods.....                                                                      | S3  |
| 2. Synthesis and general procedures.....                                                           | S5  |
| 2.1. Synthesis of monomers.....                                                                    | S5  |
| <b>Figure S1.</b> <sup>1</sup> H NMR spectra.....                                                  | S6  |
| <b>Figure S2.</b> <sup>13</sup> C NMR spectra.....                                                 | S6  |
| <b>Figure S3.</b> HRMS spectra.....                                                                | S7  |
| 2.2. Synthesis and characterization of COFs.....                                                   | S8  |
| <b>Figure S4.</b> FT-TR spectra.....                                                               | S9  |
| <b>Figure S5.</b> <sup>13</sup> C CP/MAS NMR spectra.....                                          | S9  |
| <b>Figure S6.</b> TGA curves.....                                                                  | S10 |
| <b>Figure S7.</b> PXRD patterns with different stacking models.....                                | S10 |
| <b>Figure S8.</b> Enlarged experimental and simulated PXRD patterns.....                           | S10 |
| <b>Figure S9.</b> SEM images.....                                                                  | S11 |
| <b>Figure S10.</b> TEM images.....                                                                 | S11 |
| <b>Figure S11.</b> AFM image and layer distance .....                                              | S12 |
| 2.3. Fluorescence detection performance                                                            |     |
| <b>Figure S12.</b> Photoluminescence images.....                                                   | S12 |
| <b>Figure S13.</b> CIE chromaticity diagram.....                                                   | S13 |
| <b>Figures S14-16.</b> Fluorescence quenching experiments.....                                     | S13 |
| <b>Figure S17.</b> Mechanism study for fluorescence quenching experiments.....                     | S15 |
| <b>Figure S18.</b> Recycle, specificity, and anti-interference experiments.....                    | S15 |
| 2.4. Unit cell parameters and fractional atomic coordinates.....                                   | S16 |
| <b>Table S1-2.</b> Unit cell parameters and fractional atomic coordinates.....                     | S16 |
| 2.5. Quantum yield (PLQY) data of reported fluorescent COFs.....                                   | S19 |
| <b>Table S3.</b> Comparative table for quantum yield (PLQY) data of reported fluorescent COFs..... | S19 |
| S19                                                                                                |     |
| 3. References.....                                                                                 | S21 |

## 1. Materials and methods

All the chemicals are commercially available, and used without further purification. All solvents were dried and distilled according to conventional methods.

**Power X-ray diffraction (PXRD):** PXRD patterns were collected on an X-ray diffraction (XRD) system (DX-27mini, China) using Cu K $\alpha$  radiation.

**Fourier transform infrared (FT-IR):** IR spectrum was measured on an IR spectrometer (Nicolet 6700) between the ranges of 4000 to 400 cm<sup>-1</sup>.

**Solution nuclear magnetic resonance (NMR):** Liquid state <sup>1</sup>H nuclear magnetic resonance spectroscopy was collected on a Varian Mercury Plus 400 NMR Spectrometer. Liquid State <sup>13</sup>C nuclear magnetic resonance spectroscopy was collected on a Bruker Ascend<sup>TM</sup> 400 MHz NMR Spectrometer.

**High resolution mass spectrometry (HRMS):** The electrospray ionization mass spectrometry (ESI-MS) spectra were recorded using an Sciex X500R QTOF MS spectrometer.

**Solid-state nuclear magnetic resonance (ssNMR):** Solid-state nuclear magnetic resonance (NMR) data were performed on a Bruker AVANCE III 600 spectrometer with cross-polarization magic-angle-spinning (CP/MAS) at a resonance frequency of 150.9 MHz. <sup>13</sup>C CP/MAS NMR spectra were recorded using a 4 mm MAS probe and a spinning rate of 12kHz. A contact time of 4 ms and a recycle delay of 2 s were used for the <sup>13</sup>C CP/MAS NMR measurement. The chemical shifts of <sup>13</sup>C were externally referenced to tetramethylsilane (TMS).

**Elemental analyses (EA):** Elemental analyses were performed on an Elementar vario MICRO UNICUBE series CHN elemental analyzer.

**Scanning electron microscope (SEM):** SEM images were collected using a GeminiSEM 500 system.

**Transmission electron microscope (TEM):** TEM images were obtained with a Tecnai G2 F30 S-Twin.

**Thermogravimetric analysis (TGA):** TGA was performed using a TA Q5000 under flowing N<sub>2</sub> with 20 K min<sup>-1</sup> ramp rate. Samples were heated in a Platinum pan (700 °C, 20 °C min<sup>-1</sup>) under a N<sub>2</sub> flux (25 mL min<sup>-1</sup>).

**Atomic force microscopy (AFM):** AFM image were recorded using a Bruker Dimension Edge AFM in tapping mode and processed by Nanoscope Analysis.

**Fluorescence Spectra and Quantum Yield:** Fluorescence spectra were recorded with a Hitachi F-4600 fluorescence spectrophotometer. The fluorescence quantum yield was measured with an Absolute PL quantum Yield Spectrometer QY C11347-01 ,02.

**Crystal structure modeling :** Structural modeling of COFs was generated using the Materials Studio<sup>S1</sup> program employing the *Building (Crystal)* module, the lattice model was geometrically optimized using force-filed based method (*Forcite* molecular dynamics module) and SCC-DFTB (*DFTB +* module). The Pawley fitting (*Reflex* module) was performed to optimize the lattice parameters iteratively until the Rwp value converges and the overlay of the observed with refined profiles shows good agreement. Powder indexing and Rietveld refinement were performed using EXPO2014<sup>S2</sup> various topology structures were illustrated by VESTA software <sup>S3</sup>.

**Fluorescence detection:** In a typical experimental setup, 1 mg of TPE-DBC-COF nanosheets were sonicated and dispersed in 2 mL of acetone. Then 20  $\mu$ L of tetracycline hydrochloride solution with gradient concentration (n mM) were added. Fluorescence (FL) spectra of the mixed solutions with  $n \times 10^{-2}$  mM concentration of tetracycline hydrochloride were then collected using with a Hitachi F-4600 fluorescence spectrophotometer with excitation wavelength of 365 nm and emission slit of 5 nm. All detective experiments were performed 3 times and reported consistent results.

The fluorescence detection of chloramphenicol and carbamazepine using TPE-DBC-COF nanosheets were performed under the same protocol except the chloramphenicol and carbamazepine were dissolved in acetone.

## 2. Synthesis and general procedures

### 2.1 Synthesis of monomers

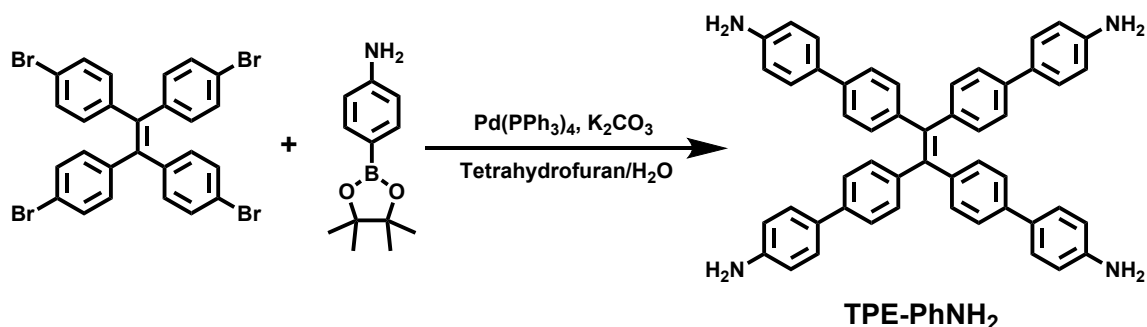

**Scheme S1.** 4',4''',4''''',4''''''-(ethene-1,1,2,2-tetrayl)tetrakis([1,1'-biphenyl]-4-amine) (**TPE-PhNH<sub>2</sub>**).

4',4''',4''''',4''''''-(ethene-1,1,2,2-tetrayl)tetrakis([1,1'-biphenyl]-4-amine) (**TPE-PhNH<sub>2</sub>**) was synthesized according to a previously published procedure.<sup>S4</sup> 1,1,2,2-tetrakis(4-bromophenyl)ethene (1.00 g, 1.55 mmol), 4-aminophenylboronic acid pinacol ester (2.72 g, 12.4 mmol), K<sub>2</sub>CO<sub>3</sub> (2.57 g, 18.60 mmol), and Pd(PPh<sub>3</sub>)<sub>4</sub> (0.18 g, 0.16 mmol) were mixed in a 250 mL single neck flask, then Tetrahydrofuran (120 mL) and H<sub>2</sub>O (40 mL) were added. The mixture was heated at 80 °C for 24 h under nitrogen atmosphere and then cooled to room temperature, followed by extraction with dichloromethane. After the organic phase was washed with brine and dried over MgSO<sub>4</sub>, the organic solvent was removed under reduced pressure. **TPE-PhNH<sub>2</sub>** was purified by column chromatography (EA/petroleum ether, 2/1) and obtained as a yellow solid (0.61 g, yield: 57 %).

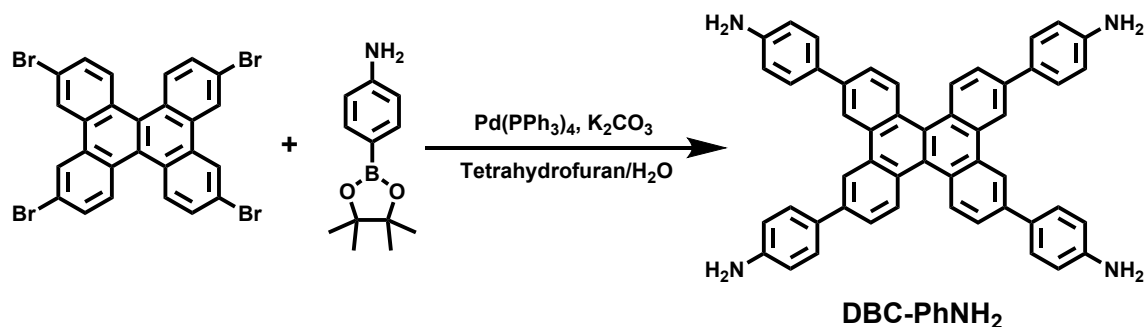

**Scheme S2.** 4,4',4'',4'''-(dibenzo[g,p]chrysene-2,7,10,15-tetrayl)tetraaniline (**DBC-PhNH<sub>2</sub>**).

4,4',4'',4'''-(dibenzo[g,p]chrysene-2,7,10,15-tetrayl)tetraaniline (**DBC-PhNH<sub>2</sub>**) was conducted via the Suzuki reaction. 2,7,10,15-tetrabromo-dibenzo[g,p]chrysene (1.00g, 1.56 mmol), 4-aminophenylboronic acid pinacol ester (2.72 g, 12.4 mmol), K<sub>2</sub>CO<sub>3</sub> (2.57 g, 18.6 mmol), and Pd(PPh<sub>3</sub>)<sub>4</sub> (0.18 g, 0.16 mmol) were mixed in a 250 mL single neck flask, then Tetrahydrofuran (120 mL) and H<sub>2</sub>O (40 mL) were added. The mixture was heated at 80 °C for 24 h under nitrogen atmosphere and then cooled to room temperature, followed by extraction with dichloromethane. After the organic phase was washed with brine and dried over MgSO<sub>4</sub>, the organic solvent was removed under reduced pressure. **DCB-PhNH<sub>2</sub>** was purified by column chromatography (dichloromethane/methanol, 20/1) and obtained as a yellow solid (0.53 g, yield: 49.1%).<sup>1</sup>H NMR (400 MHz, DMSO-d<sub>6</sub>): δ 8.98 (s, 4H), 8.61 (d, 4H), 7.91 (d, 4H), 7.72 (d, 8H), 6.71 (d, 8H), 5.31 (s, 8H).

$^{13}\text{C}$  NMR (400 MHz,  $\text{DMSO-d}_6$ ):  $\delta$  149.17, 139.38, 131.30, 129.25, 128.35, 127.44, 127.14, 126.34, 125.28, 120.24, 114.78. HRMS (ESI+):  $m/z$ : Calcd for  $[\text{C}_{50}\text{H}_{36}\text{N}_4+\text{H}^+]$ : 693.2940, found 693.2999.

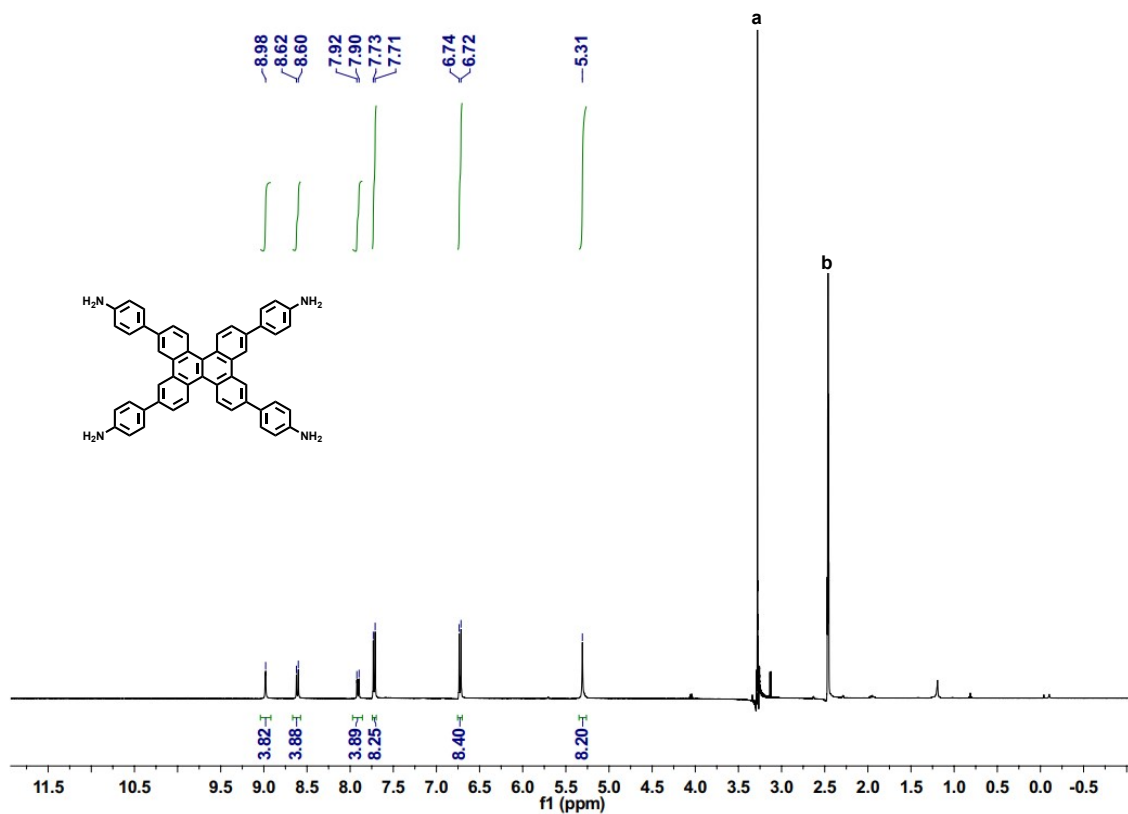

**Figure S1.**  $^1\text{H}$  NMR spectra of **DBC-PhNH<sub>2</sub>**. Solvent peaks of H<sub>2</sub>O (a), DMSO (b).

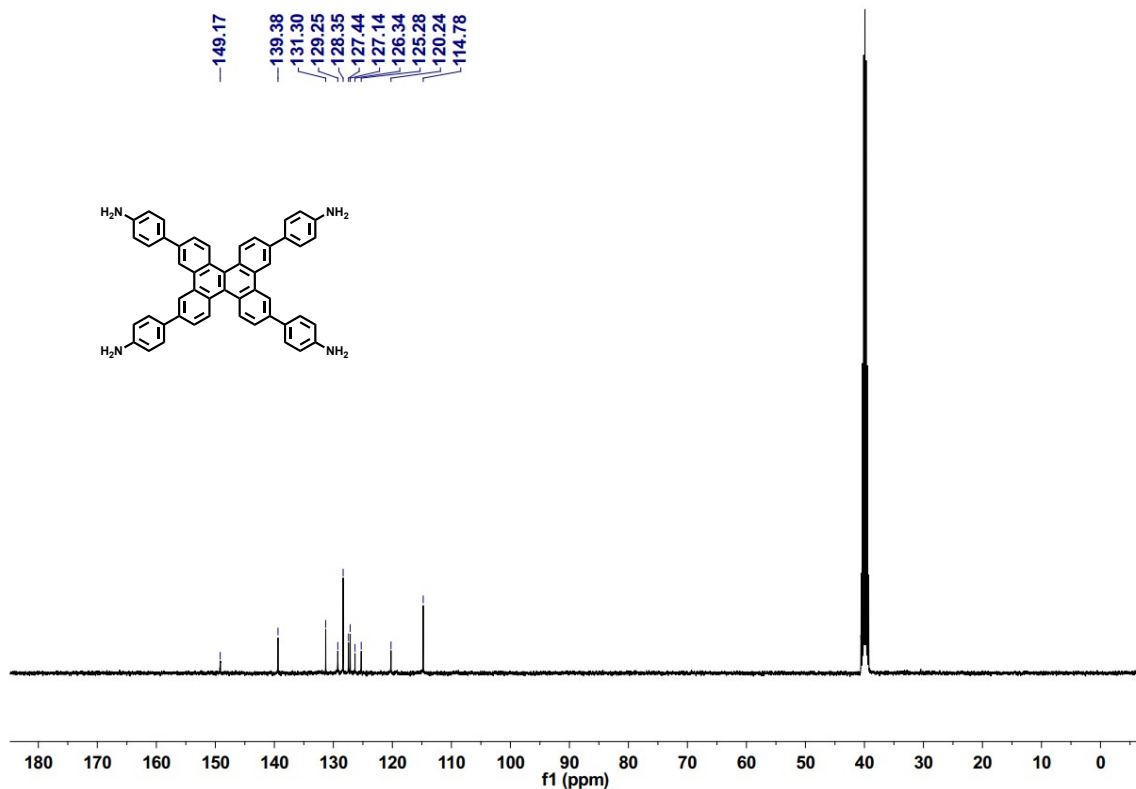

**Figure S2.**  $^{13}\text{C}$  NMR spectra of **DBC-PhNH<sub>2</sub>**.

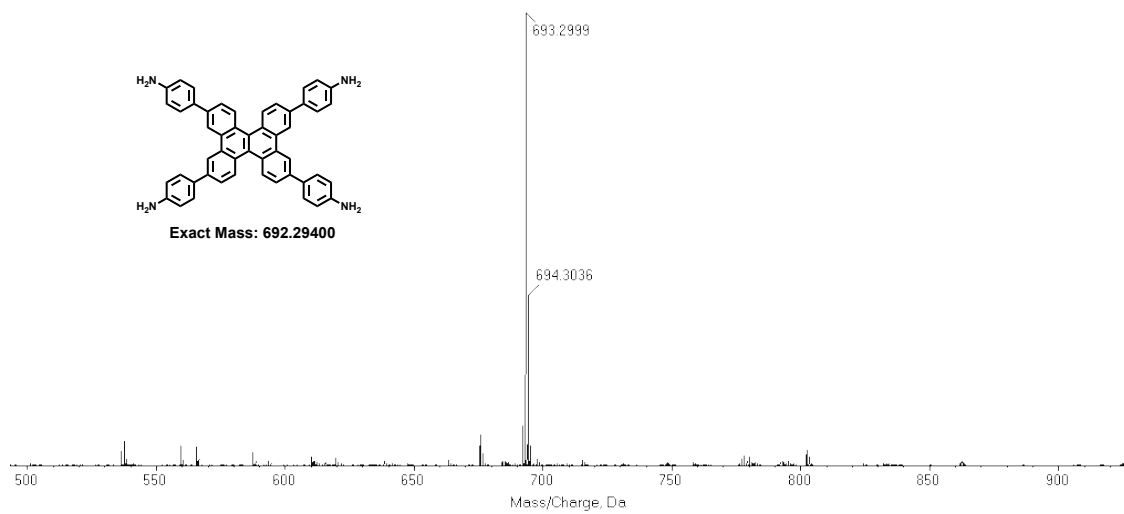

**Figure S3.** HRMS spectra of **DBC-PhNH<sub>2</sub>**.

## 2.2 Synthesis and characterization of COFs

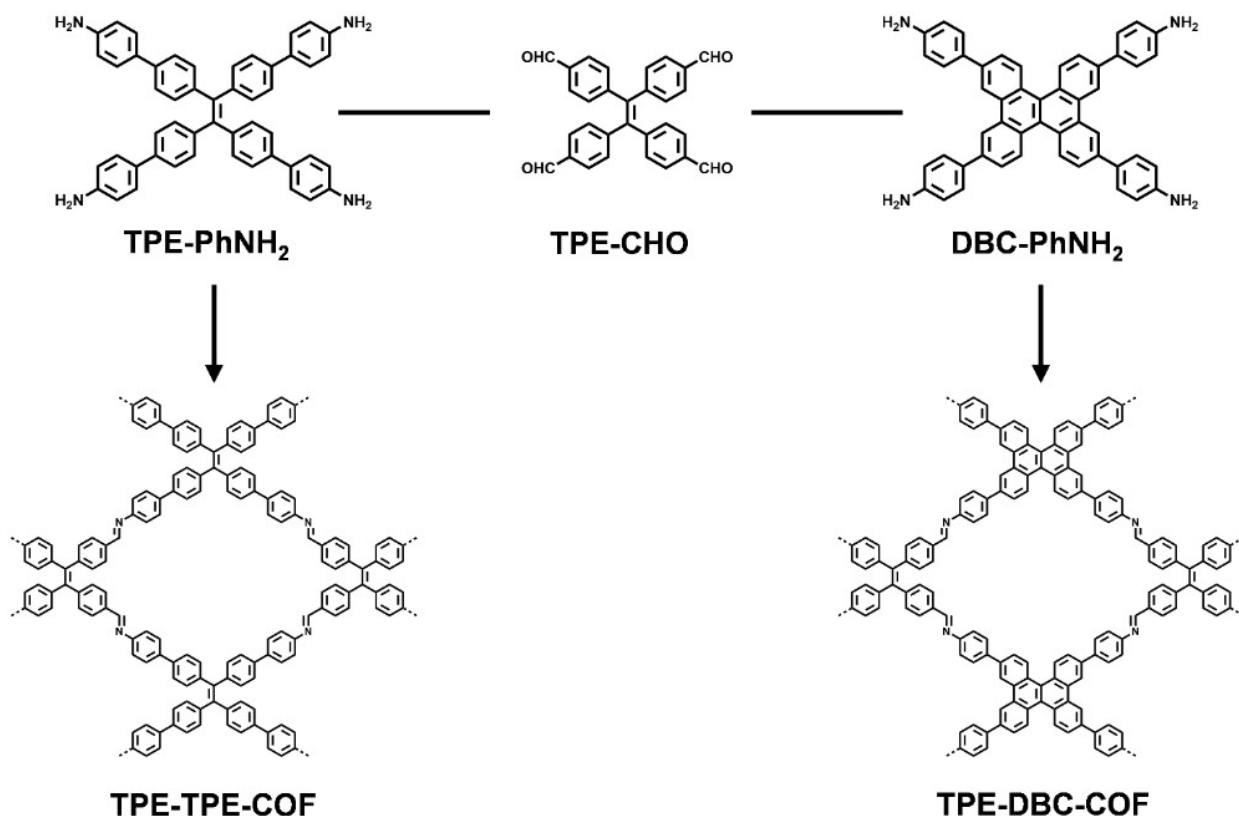

**TPE-TPE-COF:** TPE-PhNH<sub>2</sub> (27.9 mg, 0.04 mmol) and TPE-CHO (17.8 mg, 0.04mmol) were added into a glass ampoule with Mesitylene (0.6 mL) and Dioxane (0.6mL). The solution was sonicated for 5 minutes to obtain light yellow turbid solution. 6 M acetic acid (0.6mL) were added into the glass ampoule as catalyst. The glass ampoule was flash frozen at 77 K using the liquid nitrogen bath and degassed by freeze-pump-thaw three times, and then sealed. The glass ampoule was placed in an oven at 120 °C for 4 days. The yellow solid was isolated by centrifugation and washed with N, N-dimethylacetamide (3×10 mL) and acetone (3×10 mL). The resulting precipitate was filtered then exhaustively washed with tetrahydrofuran and acetone by Soxhlet extraction for 48 hours. The sample was then transferred to vacuum chamber and evacuated to 20 mTorr at 80 °C for 24 h, yielding yellow powder TPE-TPE-COF (Yield: 40.73 mg, 90.5%). Elemental analysis of TPE-TPE-COF with a molecular formula of (C<sub>80</sub>H<sub>52</sub>N<sub>4</sub>)<sub>n</sub> (% Calc/Found: C 89.89/89.73, H 4.87/4.91, N 5.24/5.36).

**TPE-DCB-COF:** DCB-PhNH<sub>2</sub> (27.71mg, 0.04 mmol) and TPE-CHO (17.8 mg, 0.04mmol) were weighed into a glass ampoule with Mesitylene (0.6 mL) and Dioxane (0.6mL). The solution was sonicated for 5 minutes to obtain light yellow turbid solution. 6 M acetic acid (0.2 mL) was added into the glass ampoule as catalyst. The glass ampoule was flash frozen at 77 K using the liquid nitrogen bath and degassed by freeze-pump-thaw three times, and then sealed. The glass ampoule was placed in an oven at 120 °C for 4 days. The yellow solid was isolated by centrifugation and washed with N, N-dimethylacetamide (3×10 mL) and acetone (3×10 mL). The resulting precipitate was filtered then exhaustively washed with tetrahydrofuran and acetone by Soxhlet extraction for 48 hours. The sample was then transferred to vacuum chamber and evacuated to 20 mTorr at 80 °C for



24 h, yielding yellow powder TPE-DCB-COF (Yield: 38.65 mg, 86.3%). Elemental analysis of TPE-DCB-COF with a molecular formula of  $(C_{80}H_{48}N_4)_n$  (% Calc/Found: C 90.23/90.33, H 4.51/4.27, N 5.26/5.40).

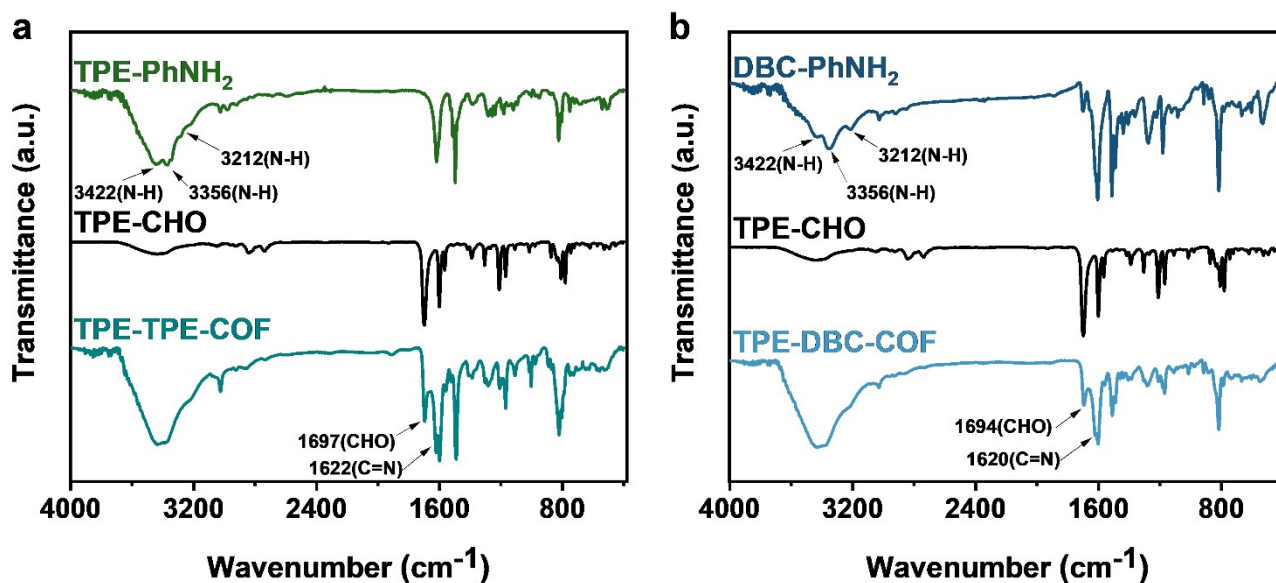

Figure S4. FT-IR spectra of (a) TPE-TPE-COF and (b) TPE-DBC-COF.

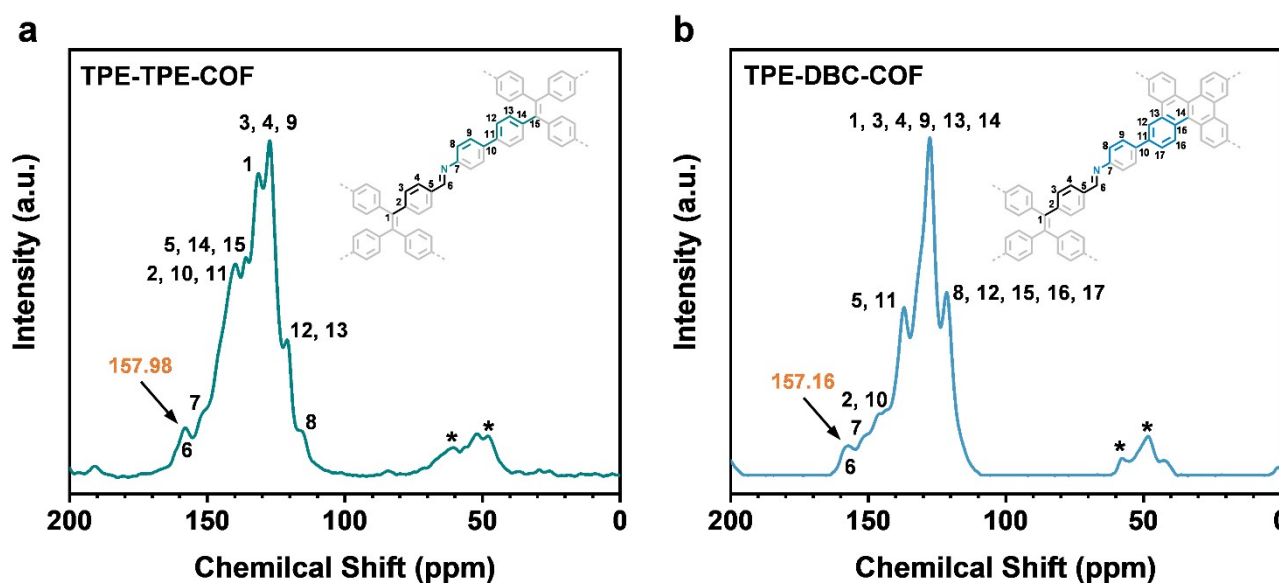

Figure S5.  $^{13}C$  CP/MAS NMR spectra of (a) TPE-TPE-COF and (b) TPE-DBC-COF. Asterisks (\*) indicate peaks may arising from solvent molecules or spinning side bands.

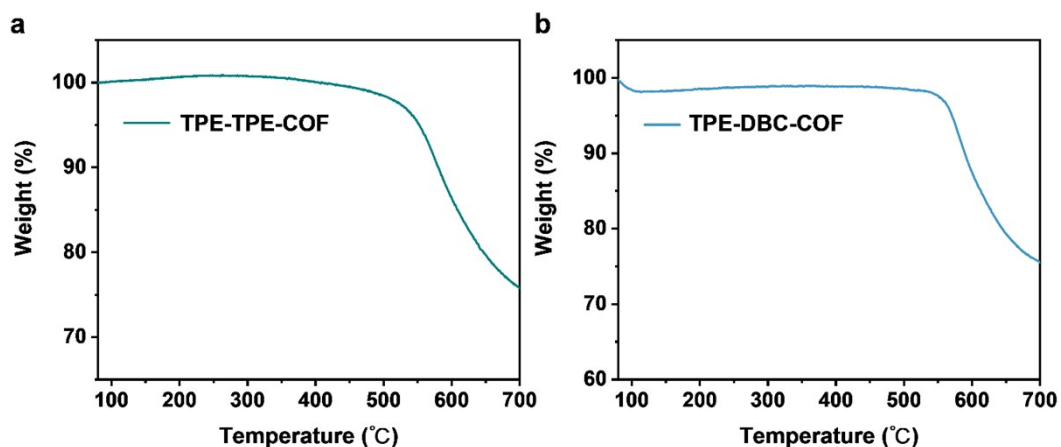

**Figure S6.** TGA curves of (a) TPE-TPE-COF and (b) TPE-DBC-COF.

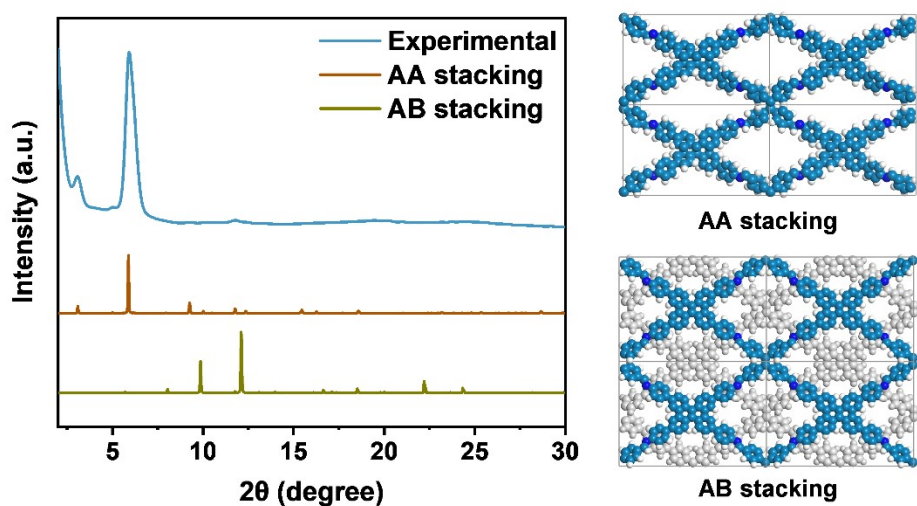

**Figure S7.** Simulated PXRD patterns of TPE-DCB-COF with different stacking models.

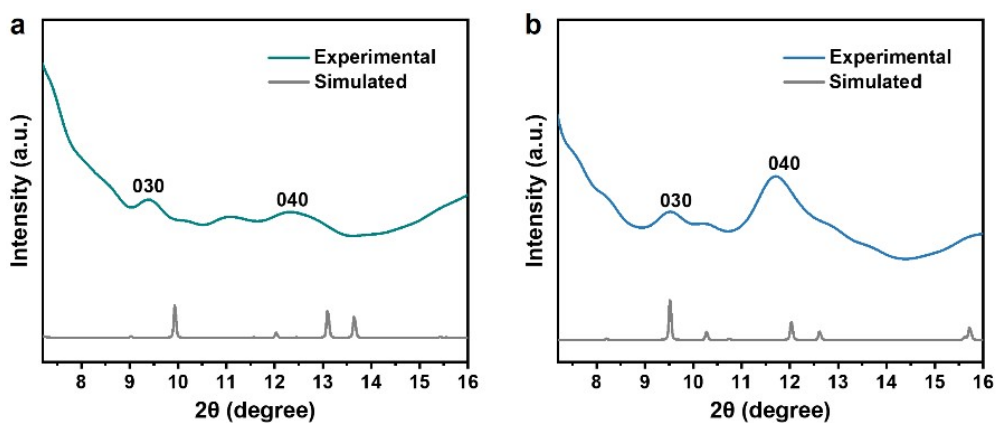

**Figure S8.** Enlarged experimental and simulated PXRD patterns for TPE-TPE-COF (a) and TPE-DBC-COF (b).

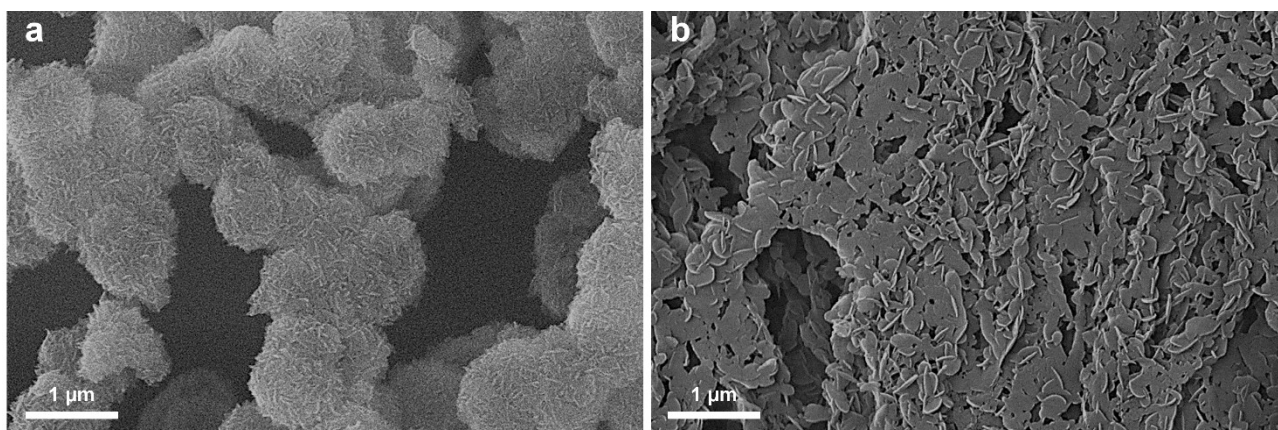

**Figure S9.** SEM images of (a) TPE-TPE-COF and (b) TPE-DBC-COF.

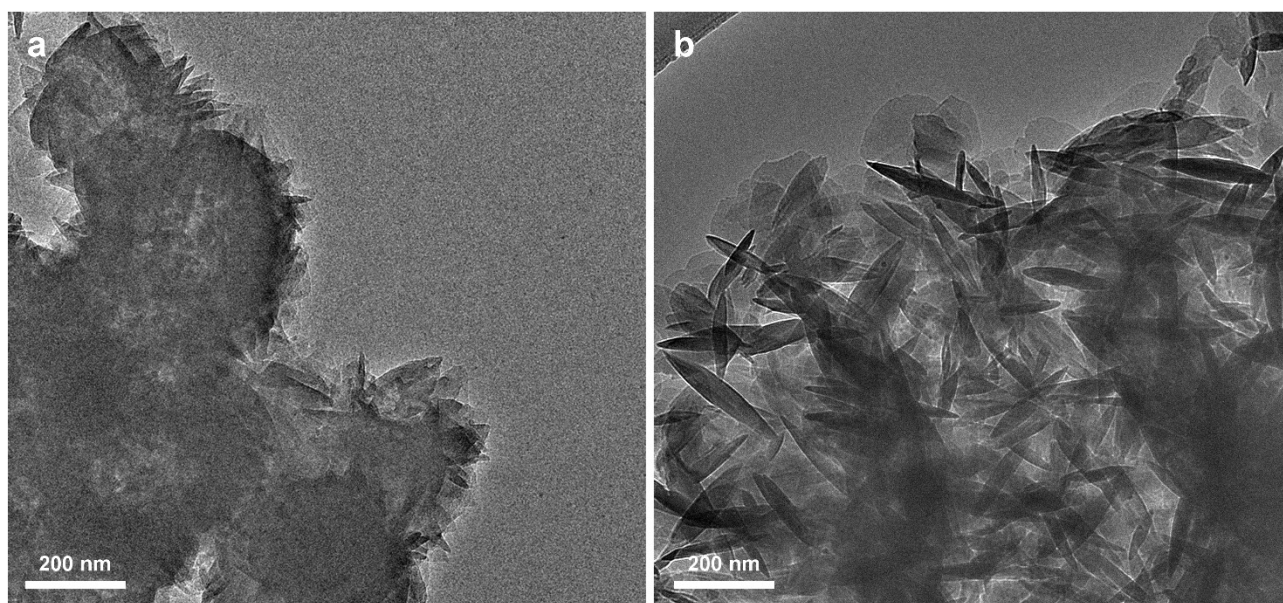

**Figure S10.** TEM images of (a) TPE-TPE-COF and (b) TPE-DBC-COF.

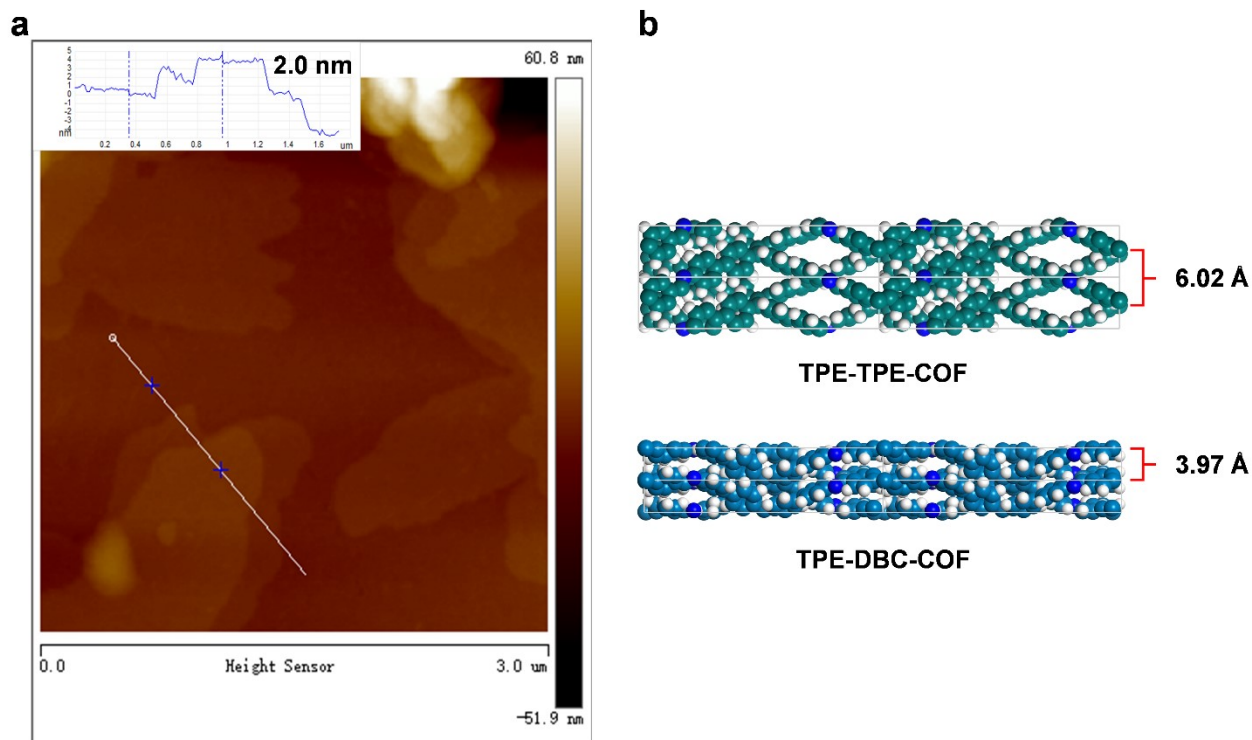

**Figure S11.** (a) AFM image of TPE-DBC-COF nanosheets with the thickness indicated. (b) Side view and layer distances of TPE-TPE-COF and TPE-DBC-COF.

### 2.3 Fluorescence detection performance

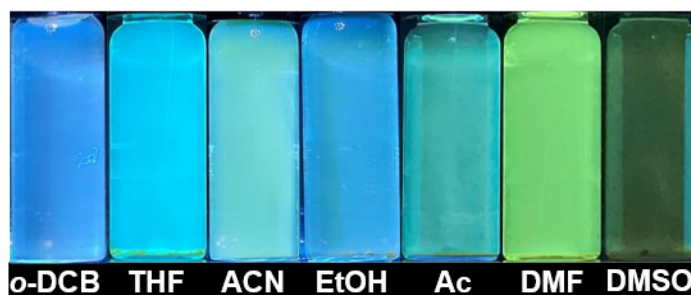

**Figure S12.** Photoluminescence images of TPE-DBC-COF dispersed in different solvents, using 365 nm illumination.

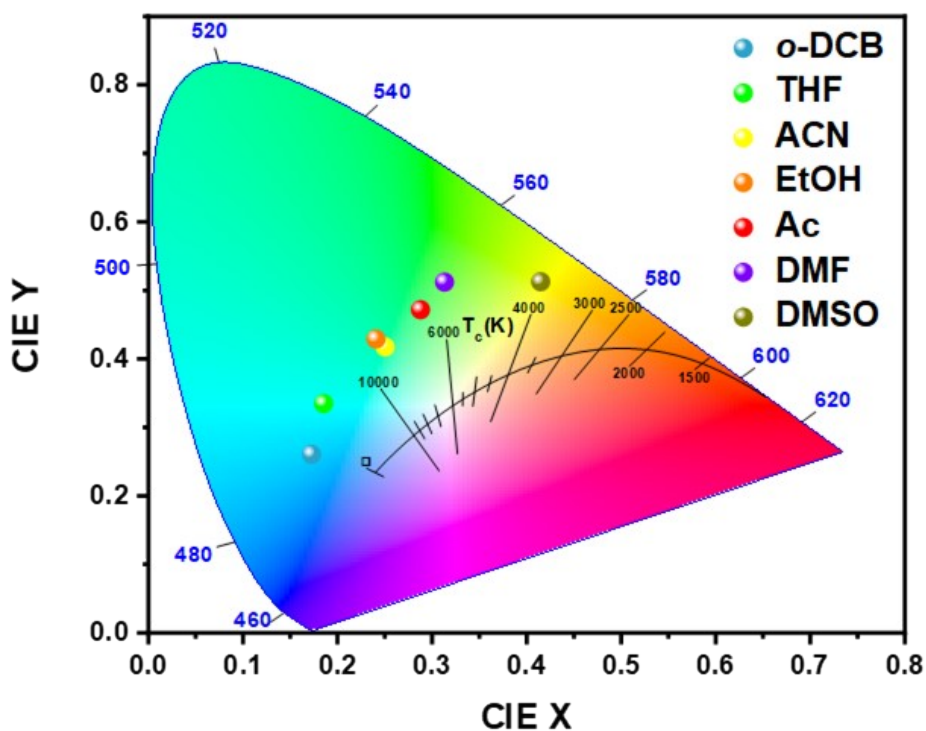

**Figure S13.** CIE chromaticity diagram of TPE-DBC-COF dispersed in different solvents, under 365 nm illumination.

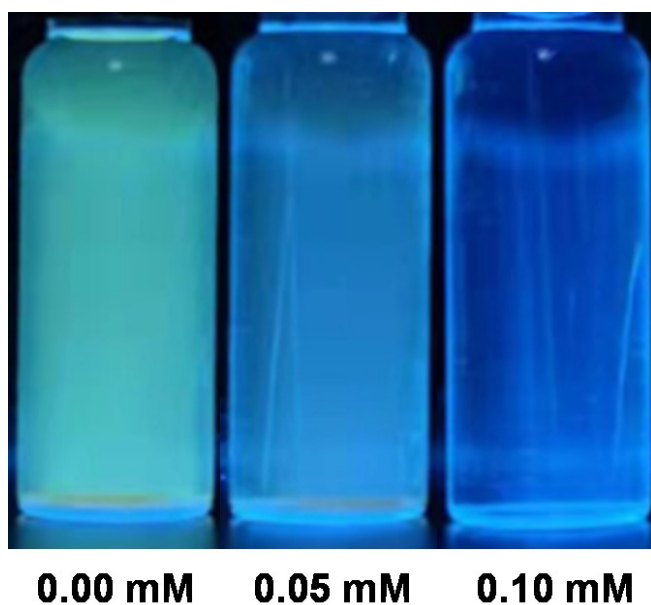

**Figure S14.** Fluorescence images of TPE-DBC-COF dispersed in acetone solution in the presence of different concentrations of tetracycline hydrochloride, using 365 nm illumination.

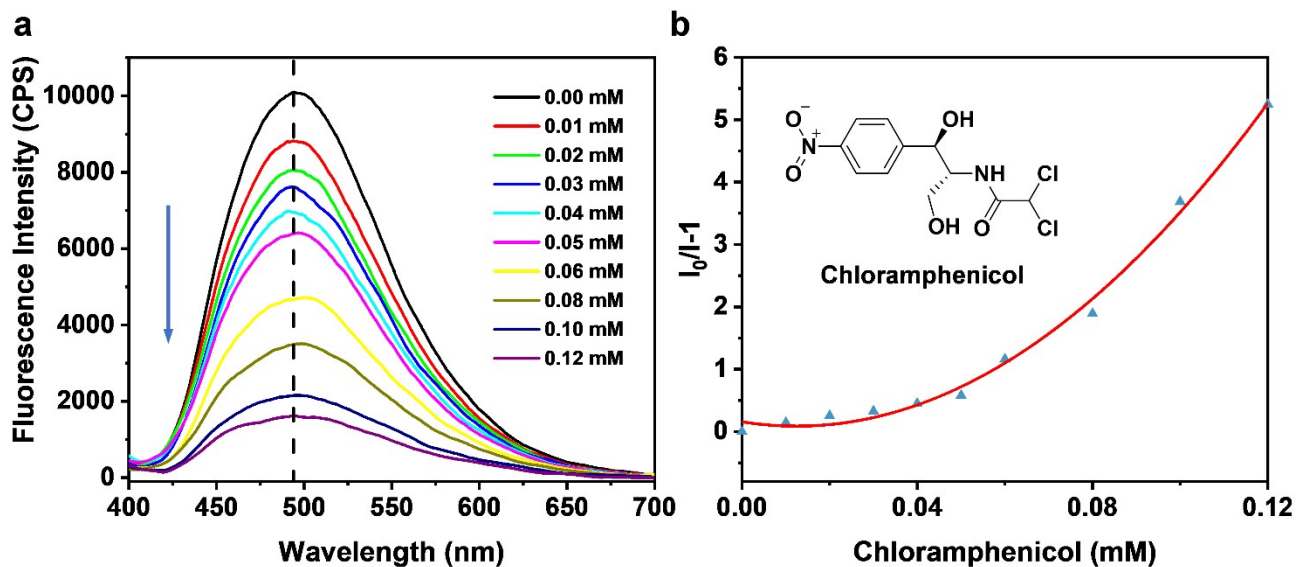

**Figure S15.** (a) Fluorescence quenching experiments of the TPE-DBC-COF upon addition of chloramphenicol (0.01-0.12 mM) in acetone. (b) Quantitative fitting curve of the fluorescence quenching process of TPE-DBC-COF nanosheets by chloramphenicol, the fitted curve is  $I_0/I = 1.16 - 11.15 \times C_{\text{chloramphenicol}} + 447.54 \times C_{\text{chloramphenicol}}^2$ .

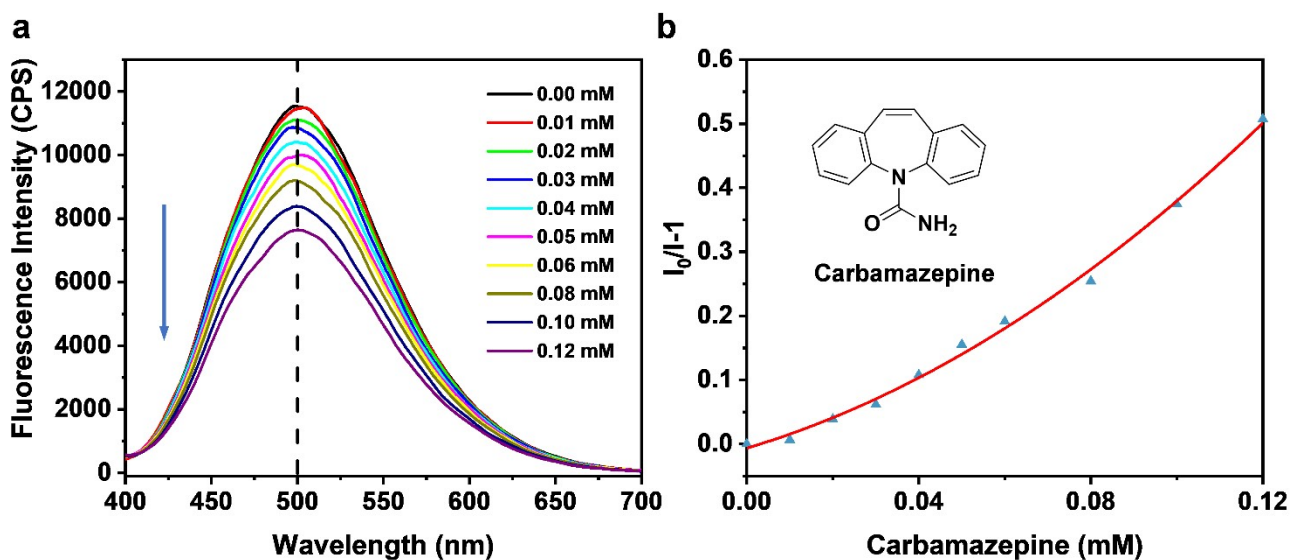

**Figure S16.** (a) Fluorescence quenching experiments of the TPE-DBC-COF upon addition of carbamazepine (0.01-0.12 mM) in acetone. (b) Quantitative fitting curve of the fluorescence quenching process of TPE-DBC-COF nanosheets by carbamazepine, the fitted curve is  $I_0/I = 1.00 - 2.01 \times C_{\text{carbamazepine}} + 18.52 \times C_{\text{carbamazepine}}^2$ .

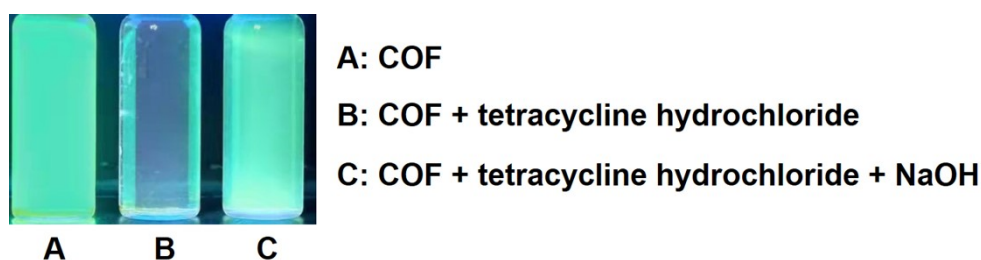

**Figure S17.** Fluorescence quenching images of TPE-DBC-COF by adding tetracycline hydrochloride and fluorescence recovery by adding NaOH solution.

As shown in Figure S17, in order to verify the electron transfer mechanism, the fluorescence of TPE-DBC-COF nanosheets were firstly quenched with 0.2 mM tetracycline hydrochloride, and then an equivalent of NaOH solution was added to the system. The addition of NaOH can effectively block the charge transfer process via eliminating the lack of electricity of tetracycline hydrochloride, and the fluorescence of TPE-DBC-COF nanosheets was recovered, confirming the proposed charge transfer mechanism.

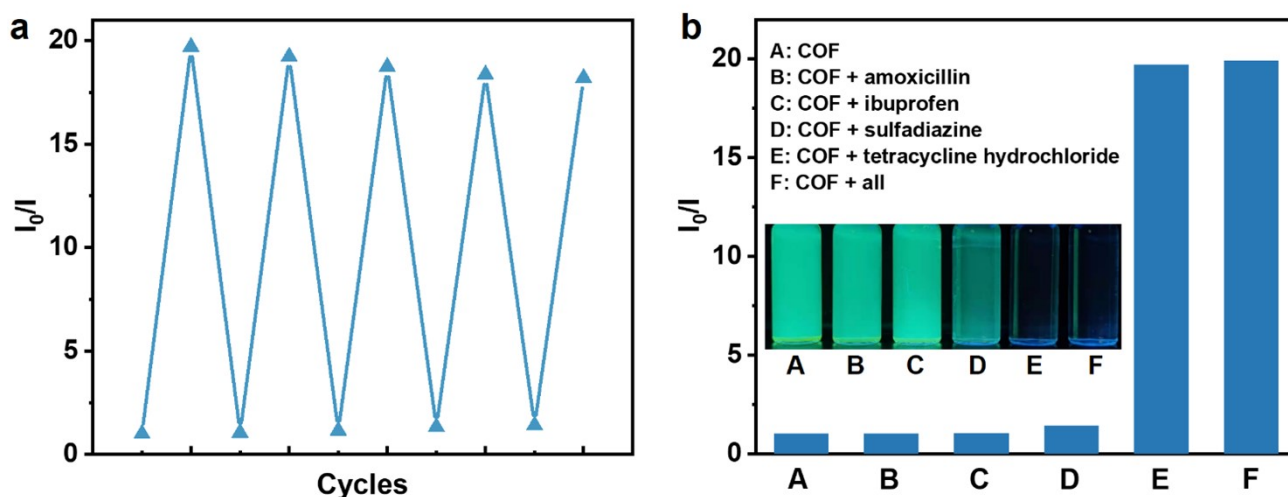

**Figure S18.** (a) Fluorescence quenching experiments of TPE-DBC-COF nanosheets toward 0.1 mM tetracycline hydrochloride for continuous 5 cycles. (b) Fluorescence quenching experiments of TPE-DBC-COF nanosheets upon addition of different antibiotics (0.1 mM). Inset: fluorescence quenching images.  $I_0$  and  $I$  are the luminescence intensity of TPE-DBC-COF nanosheets before and after addition of antibiotics, using 365 nm illumination.

## 2.4 Unit cell parameters and fractional atomic coordinates

**Table S1.** Unit cell parameters and fractional atomic coordinates for **TPE-TPE-COF** calculated based on AA stacking.

| Space group          |         | <i>P2</i>                                                                                                                                                       |         |
|----------------------|---------|-----------------------------------------------------------------------------------------------------------------------------------------------------------------|---------|
| Calculated unit cell |         | $a = 15.3572 \text{ \AA}, b = 28.0463 \text{ \AA},$<br>$c = 6.0241 \text{ \AA}$<br>$\alpha = 90.0000^\circ, \beta = 94.3906^\circ,$<br>$\gamma = 90.0000^\circ$ |         |
| Atoms                | X       | Y                                                                                                                                                               | Z       |
| C1                   | 0.91844 | 0.0464                                                                                                                                                          | 0.61739 |
| C2                   | 0.96613 | 0.08297                                                                                                                                                         | 0.72912 |
| C3                   | 0.92406 | 0.12421                                                                                                                                                         | 0.79489 |
| C4                   | 0.83362 | 0.12917                                                                                                                                                         | 0.75232 |
| C5                   | 0.78565 | 0.09266                                                                                                                                                         | 0.64285 |
| C6                   | 0.82776 | 0.0515                                                                                                                                                          | 0.57608 |
| C7                   | 0.78783 | 0.17163                                                                                                                                                         | 0.82412 |
| N8                   | 0.82904 | 0.20583                                                                                                                                                         | 0.93221 |
| C9                   | 0.78621 | 0.24763                                                                                                                                                         | 1.00617 |
| C10                  | 0.83574 | 0.28273                                                                                                                                                         | 1.12216 |
| C11                  | 0.79561 | 0.32387                                                                                                                                                         | 1.19675 |
| C12                  | 0.70513 | 0.33049                                                                                                                                                         | 1.15667 |
| C13                  | 0.65571 | 0.2951                                                                                                                                                          | 1.04028 |
| C14                  | 0.69573 | 0.25404                                                                                                                                                         | 0.96567 |
| C15                  | 0.66231 | 0.37421                                                                                                                                                         | 1.23329 |
| C16                  | 0.57163 | 0.37974                                                                                                                                                         | 1.19761 |
| C17                  | 0.53069 | 0.42121                                                                                                                                                         | 1.26413 |
| C18                  | 0.57953 | 0.45781                                                                                                                                                         | 1.37139 |
| C19                  | 0.67037 | 0.45253                                                                                                                                                         | 1.40693 |
| C20                  | 0.7114  | 0.41112                                                                                                                                                         | 1.33874 |
| C21                  | 0.08083 | 0.95674                                                                                                                                                         | 2.38621 |
| C22                  | 0.10523 | 0.92271                                                                                                                                                         | 2.54997 |
| C23                  | 0.14262 | 0.87953                                                                                                                                                         | 2.49121 |
| C24                  | 0.15629 | 0.87004                                                                                                                                                         | 2.2687  |
| C25                  | 0.1335  | 0.90434                                                                                                                                                         | 2.10543 |



|     |         |         |         |
|-----|---------|---------|---------|
| C26 | 0.09618 | 0.94749 | 2.164   |
| C27 | 0.19312 | 0.82394 | 2.21022 |
| N28 | 0.20528 | 0.81307 | 2.00567 |
| C29 | 0.24023 | 0.76816 | 1.94246 |
| C30 | 0.25249 | 0.7597  | 1.71835 |
| C31 | 0.2863  | 0.71612 | 1.65213 |
| C32 | 0.30824 | 0.68023 | 1.80903 |
| C33 | 0.29567 | 0.68892 | 2.03378 |
| C34 | 0.26196 | 0.73242 | 2.10006 |
| C35 | 0.34503 | 0.6342  | 1.73984 |
| C36 | 0.35889 | 0.62539 | 1.51581 |
| C37 | 0.39575 | 0.58239 | 1.45253 |
| C38 | 0.41981 | 0.54758 | 1.61262 |
| C39 | 0.40438 | 0.55584 | 1.8354  |
| C40 | 0.36753 | 0.59876 | 1.89835 |
| C41 | 0.96151 | 0.00189 | 0.54911 |
| C42 | 0.46221 | 0.50242 | 1.55112 |

**Table S2.** Unit cell parameters and fractional atomic coordinates for **TPE-DBC-COF** calculated based on AA stacking.

| Space group          |         | <i>P2</i>                                                                                                                                                       |          |
|----------------------|---------|-----------------------------------------------------------------------------------------------------------------------------------------------------------------|----------|
| Calculated unit cell |         | $a = 18.0908 \text{ \AA}, b = 28.6446 \text{ \AA},$<br>$c = 3.9676 \text{ \AA}$<br>$\alpha = 90.0000^\circ, \beta = 77.4651^\circ,$<br>$\gamma = 90.0000^\circ$ |          |
| Atoms                | X       | Y                                                                                                                                                               | Z        |
| C1                   | 0.91339 | 0.03776                                                                                                                                                         | 0.02104  |
| C2                   | 0.92637 | 0.07776                                                                                                                                                         | 0.19648  |
| C3                   | 0.88696 | 0.11888                                                                                                                                                         | 0.18716  |
| C4                   | 0.82427 | 0.11982                                                                                                                                                         | 0.03556  |
| C5                   | 0.80385 | 0.07915                                                                                                                                                         | -0.11326 |
| C6                   | 0.84987 | 0.03959                                                                                                                                                         | 0.86971  |
| C7                   | 0.77985 | 0.16265                                                                                                                                                         | 0.04847  |
| N8                   | 0.80237 | 0.19869                                                                                                                                                         | 0.19533  |
| C9                   | 0.76656 | 0.24266                                                                                                                                                         | 0.26976  |

|     |         |          |          |
|-----|---------|----------|----------|
| C10 | 0.80482 | 0.27586  | 0.42352  |
| C11 | 0.77009 | 0.31777  | 0.54128  |
| C12 | 0.6962  | 0.32706  | 0.503    |
| C13 | 0.6587  | 0.29406  | 0.3373   |
| C14 | 0.69341 | 0.25189  | 0.22318  |
| C15 | 0.65717 | 0.37008  | 0.64757  |
| C16 | 0.5793  | 0.3694   | 0.79083  |
| C17 | 0.54061 | 0.41056  | 0.91292  |
| C18 | 0.57946 | 0.45325  | 0.85712  |
| C19 | 0.65917 | 0.45243  | 0.76903  |
| C20 | 0.69742 | 0.4116   | 0.65355  |
| C21 | 0.09153 | -0.05047 | -0.04488 |
| C22 | 0.06946 | 0.90852  | 0.1392   |
| C23 | 0.11791 | 0.87089  | 0.14142  |
| C24 | 0.19258 | 0.8732   | 0.95501  |
| C25 | 0.21782 | 0.9135   | 0.7723   |
| C26 | 0.16867 | -0.04919 | 0.77439  |
| C27 | 0.24256 | 0.83275  | 0.92388  |
| N28 | 0.21655 | 0.79328  | 1.05805  |
| C29 | 0.25637 | 0.75039  | 0.98628  |
| C30 | 0.33577 | 0.74848  | 0.90438  |
| C31 | 0.37223 | 0.70763  | 0.76976  |
| C32 | 0.32963 | 0.66824  | 0.72022  |
| C33 | 0.25026 | 0.66984  | 0.81994  |
| C34 | 0.21415 | 0.71063  | 0.95586  |
| C35 | 0.36704 | 0.62533  | 0.56601  |
| C36 | 0.43134 | 0.62702  | 0.29538  |
| C37 | 0.46524 | 0.58566  | 0.14136  |
| C38 | 0.432   | 0.5424   | 0.25953  |
| C39 | 0.37256 | 0.54163  | 0.55253  |
| C40 | 0.33891 | 0.58226  | 0.69689  |
| C41 | 0.95978 | -0.00709 | 0.01741  |
| C42 | 0.46419 | 0.49796  | 0.09376  |

## 2.5 Quantum yield (PLQY) data of reported fluorescent COFs

**Table S3.** Comparative table for quantum yield (PLQY) data of reported fluorescent COFs

| COF name                    | PLQY   | Reference                                                          |
|-----------------------------|--------|--------------------------------------------------------------------|
| PAF-15                      | 14%    | <i>J. Phys. Chem. C.</i> , 2012, <b>116</b> , 26431-26435          |
| PAF-14                      | 37.5%  | <i>J. Mater. Chem.</i> , 2012, <b>22</b> , 24558-24562             |
| Ph-An-COF                   | 5.4%   | <i>Angew. Chem. Int. Ed.</i> , 2015, <b>54</b> , 8704-8707         |
| COF-JLU3                    | 9.9%   | <i>Chem. Commun.</i> , 2016, <b>52</b> , 6613-6616                 |
| COF-LZU8                    | 3.5%   | <i>J. Am. Chem. Soc.</i> , 2016, <b>138</b> , 3031-3037            |
| TPE-Ph COF                  | 32%    | <i>J. Am. Chem. Soc.</i> , 2016, <b>138</b> , 5797-5800            |
| PI-COF 201                  | 41.6%  | <i>New J. Chem.</i> , 2017, <b>41</b> , 14272-14278                |
| PI-COF 202                  | 38.0%  |                                                                    |
| IMDEA-COF-1                 | 3.5%   | <i>J. Am. Chem. Soc.</i> , 2018, <b>140</b> , 12922-12929          |
| TFPPy-DETHz-COF             | 17%    | <i>J. Am. Chem. Soc.</i> , 2018, <b>140</b> , 12374-12377          |
| sp <sup>2</sup> c-COF       | 22%    | <i>Nat. Commun.</i> , 2018, <b>9</b> , 4143                        |
| sp <sup>2</sup> c-COF-2     | 20%    |                                                                    |
| sp <sup>2</sup> c-COF-3     | 18%    |                                                                    |
| Py-TPE-COF                  | 21.1%  | <i>Chem. Commun.</i> , 2018, <b>54</b> , 2349-2352                 |
| IISERP-COF7                 | 64%    | <i>J. Am. Chem. Soc.</i> , 2018, <b>140</b> , 13367-13374          |
| 3D-TPE-COF                  | 20%    | <i>Nat. Commun.</i> , 2018, <b>9</b> , 5234                        |
| COF-BABD-DB                 | 54.1%  | <i>Chem. Commun.</i> , 2018, <b>54</b> , 2308-2311                 |
| COF-BABD-BZ                 | 22.3%  |                                                                    |
| NUS-30                      | 43.6%  | <i>Chem. Mater.</i> , 2018, <b>31</b> , 146-160                    |
| PAF-130                     | 29.5%  | <i>Macromol. Rapid Commun.</i> , 2019, <b>40</b> , 1900060         |
| COF-4-OH                    | 10.7%  | <i>Chem. Sci.</i> , 2019, <b>10</b> , 11103-11109                  |
| TFPPy-CHYD COF              | 13.6%  | <i>ACS Sustain. Chem. Eng.</i> , 2019, <b>8</b> , 445-451          |
| cyano-sp <sup>2</sup> c COF | 38.1%  | <i>Adv. Funct. Mater.</i> , 2020, <b>30</b> , 2000516              |
| BCTB-PD COF                 | 16.3%  | <i>J. Mater. Chem. C.</i> , 2020, <b>8</b> , 9520-9528             |
| BCTA-TP COF                 | 5.6%   |                                                                    |
| BCTB-BCTA COF               | 21.2%  |                                                                    |
| PyTA-BC COFs                | 1.46%  | <i>Adv. Opt. Mater.</i> , 2020, <b>8</b> , 2000641                 |
| PyTA-BC-Ph COFs             | 1.83%  |                                                                    |
| Eu-3D-COF                   | 38.2%  | <i>J. Hazard. Mater.</i> , 2020, <b>388</b> , 121740               |
| iCONs                       | 94%    | <i>ACS Appl. Mater. Interfaces</i> , 2020, <b>12</b> , 13248-13255 |
| CCOF 17-R                   | 19.0%  | <i>J. Am. Chem. Soc.</i> , 2021, <b>143</b> , 369-381              |
| CCOF 18-R                   | 20.5%  |                                                                    |
| COF-1                       | 14.28% | <i>Dyes Pigm.</i> , 2021, <b>195</b> , 109710                      |
| TMHzcB-DHTA-COF             | 3.1%   | <i>Angew. Chem. Int. Ed.</i> , 2021, <b>60</b> , 2-11              |
| TMHzcB-TFB-COF              | 5.1%   |                                                                    |
| TMHzcB-TFPB-COF             | 10.5%  |                                                                    |

|                    |              |                                                         |
|--------------------|--------------|---------------------------------------------------------|
| TMHzcB-TA-COF      | 11.7%        |                                                         |
| TMHzcB-DCTA-COF    | 6%           |                                                         |
| TMHzcB-DMeTA-COF   | 20%          |                                                         |
| TMHzcB-DMeOTA-COF  | 19%          |                                                         |
| TAT-COF            | 17.82%       | <i>J. Am. Chem. Soc.</i> , 2021, <b>143</b> , 1061-1068 |
| TPB-COF            | 62.17%       |                                                         |
| TPE-DHZ-COF        | 31.5%        | <i>Dyes Pigm.</i> , 2022, <b>204</b> , 110464           |
| TPB-DHZ-COF        | 10.3%        |                                                         |
| <b>TPE-DBC-COF</b> | <b>43.5%</b> | <b>This work</b>                                        |

### 3. References

(S1) Materials Studio; Accelrys: San Diego.

(S2) <http://www.ba.ic.cnr.it/softwareic/expo/>

(S3) <http://www.jp-minerals.org/vesta/en/>

(S4) Y. Liu, C. S. Diercks, Y. Ma, H. Lyu, C. Zhu, S. A. Alshimri, S. Alshihri and O. M. Yaghi, *J. Am. Chem. Soc.*, 2019, **141**, 677-683.
